# Supplementary material for: Bispecific antibody-mediated redirection of NKG2D-CAR natural killer cells facilitates dual targeting and enhances antitumor activity
Source: PubMed Central journal article supplement — J Immunother Cancer. 2021 Oct 1;9(10):e002980. doi: 10.1136/jitc-2021-002980 (PMC8488744; doi:10.1136/jitc-2021-002980), 2021-10-01
Supplement: jitc-2021-002980supp001.pdf [file jitc-2021-002980supp001.pdf]

## Supplemental Material

**Bispecific antibody-mediated redirection of NKG2D-CAR natural killer cells facilitates dual targeting and enhances antitumor activity**

Congcong Zhang, Jasmin Röder, Anne Scherer, Malena Bodden,  
Jordi Pfeifer Serrahima, Anita Bhatti, Anja Waldmann, Nina Müller,  
Pranav Oberoi, Winfried S. Wels

This document includes:

Supplementary Figure S1

Supplementary Figure S2

Supplementary Figure S3

Supplementary Figure S4

Supplementary Figure S5

Supplementary Figure S6

Supplementary Figure S7

Supplementary Figure S8

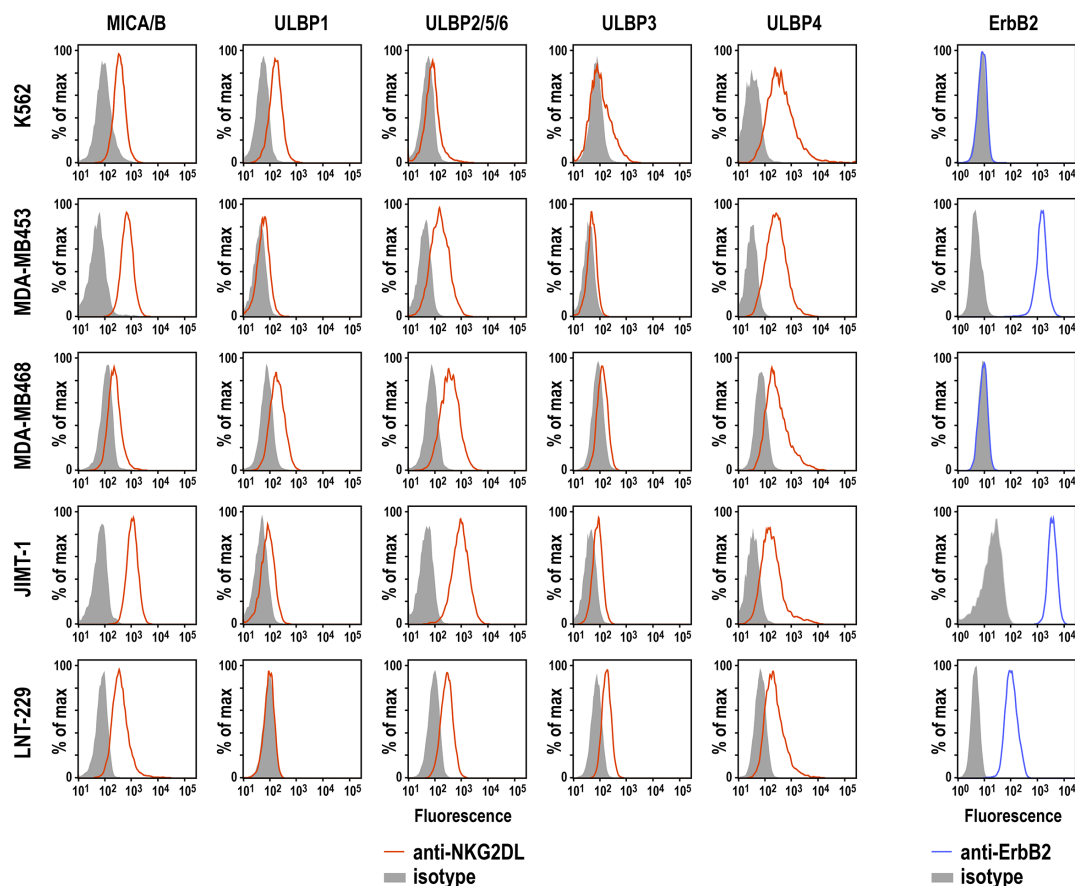

**Supplementary Figure S1** Surface expression of NKG2D ligands (NKG2DL) by K562 erythroleukemia cells, MDA-MB453, MDA-MB468 and JIMT-1 breast carcinoma cells, and LNT-229 glioblastoma cells was determined by flow cytometry with BV786-conjugated anti-human MICA/B antibody (BD Biosciences), APC-conjugated anti-ULBP1 antibody, APC-conjugated anti-ULBP2/5/6 antibody, PE-conjugated anti-ULBP3 antibody, and PE-conjugated anti-ULBP4 antibody (all R&D Systems) (left panels; solid red lines). Cells treated with isotype antibodies served as controls (left panels; filled areas). Surface expression of ErbB2 by the same cancer cell lines was determined using APC-conjugated anti-ErbB2 antibody 24D2 (BioLegend) (right panels; solid blue lines). Cells stained with an isotype antibody were included as controls (right panels; filled areas).

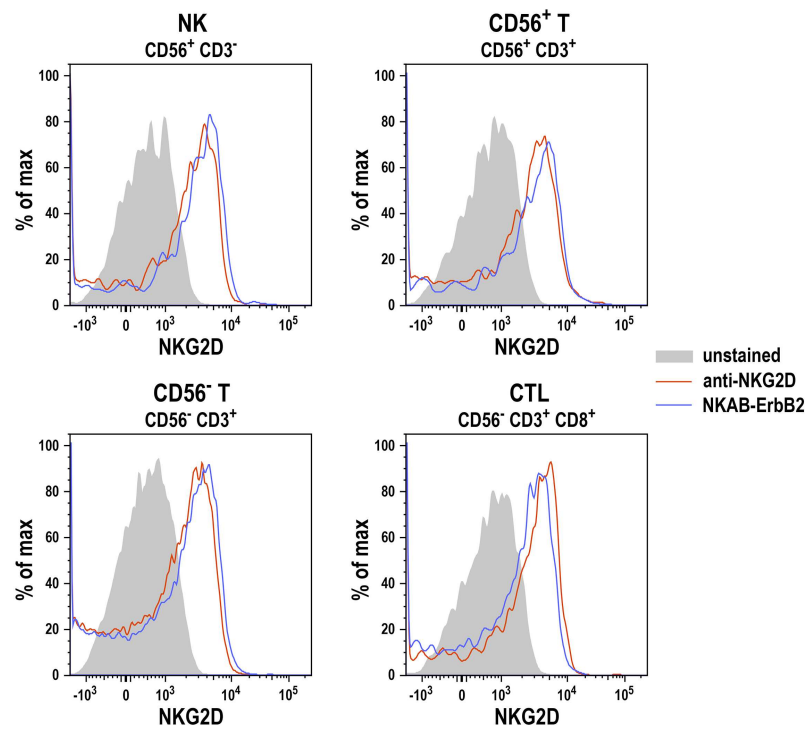

**Supplementary Figure S2** Binding of NKAB-ErbB2 to NKG2D-positive lymphocytes. Freshly isolated PBMCs were incubated with Fc Block and then stained with PerCP-conjugated anti-CD45, BV421-conjugated anti-CD56, V500-conjugated anti-CD3, and PE-Cy7-conjugated anti-CD8 antibodies. For detection of NKG2D, cells were in addition stained with APC-conjugated anti-NKG2D antibody or APC-conjugated purified NKAB-ErbB2 protein. Shown are NK cells (CD56<sup>+</sup> CD3<sup>-</sup>), CD56-positive T cells (CD56<sup>+</sup> CD3<sup>+</sup>), CD56-negative T cells (CD56<sup>-</sup> CD3<sup>+</sup>) and cytotoxic T cells (CD56<sup>-</sup> CD3<sup>+</sup> CD8<sup>+</sup>) detected with anti-NKG2D or NKAB-ErbB2 in comparison to unstained control cells among CD45-positive cells gated according to their surface marker expression. Data for a representative donor are shown.

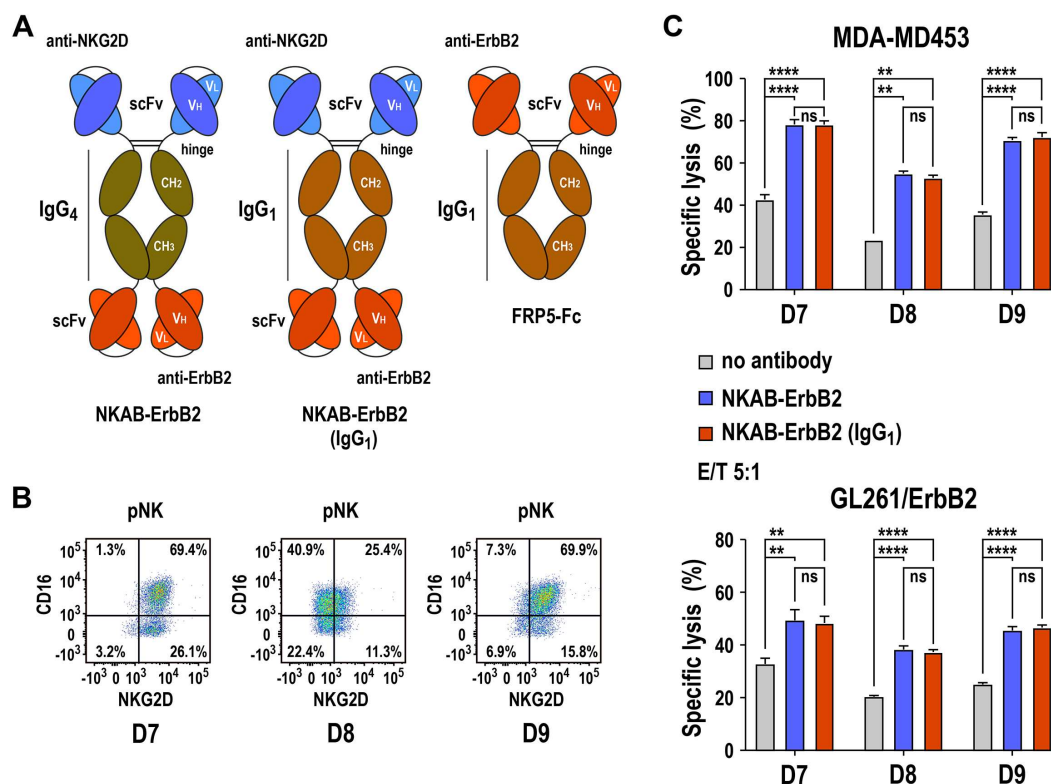

**Supplementary Figure S3** (A) Schematic representation of bispecific antibody NKAB-ErbB2 with hinge, CH<sub>2</sub> and CH<sub>3</sub> domains of human IgG<sub>4</sub> (left), the similar NKAB-ErbB2 (IgG<sub>1</sub>) molecule carrying a human IgG<sub>1</sub> Fc region instead of IgG<sub>4</sub> (middle), and the ErbB2-specific mini-antibody FRP5-Fc harboring an N-terminal scFv fragment derived from ErbB2-specific antibody FRP5, hinge, CH<sub>2</sub> and CH<sub>3</sub> domains of human IgG<sub>1</sub> (right) used in the experiments shown in Figure 4. Disulfide bridges connecting the monomers within the homodimeric molecules are indicated by lines. (B) Expression of NKG2D and CD16 by *ex vivo* expanded peripheral blood NK cells (pNK) from healthy donors (D7-D9) was analyzed by flow cytometry with anti-NKG2D and anti-CD16 antibodies as indicated. (C) Cytotoxicity of the pNK cells shown in (B) against ErbB2-expressing MDA-MB453 breast carcinoma cells (upper) and murine GL261/ErbB2 cells expressing human ErbB2 but no ligands cross-reactive with human NKG2D (lower) in the absence of bispecific antibody (gray bars), or in the presence of 0.64 nM (100 ng/mL) IgG<sub>4</sub>-based NKAB-ErbB2 (blue bars) or the similar IgG<sub>1</sub>-based NKAB-ErbB2 (IgG<sub>1</sub>) molecule (red bars) was investigated in FACS-based cytotoxicity assays after co-incubation at an effector to target ratio (E/T) of 5:1 for 3 hours. Mean values  $\pm$  SD are shown; n=3 technical replicates for each donor. Data were analyzed by two-tailed unpaired Student's *t*-test. \*\*\*\*,  $p < 0.0001$ ; \*\*,  $p < 0.01$ ; ns: not significant ( $p > 0.05$ ).

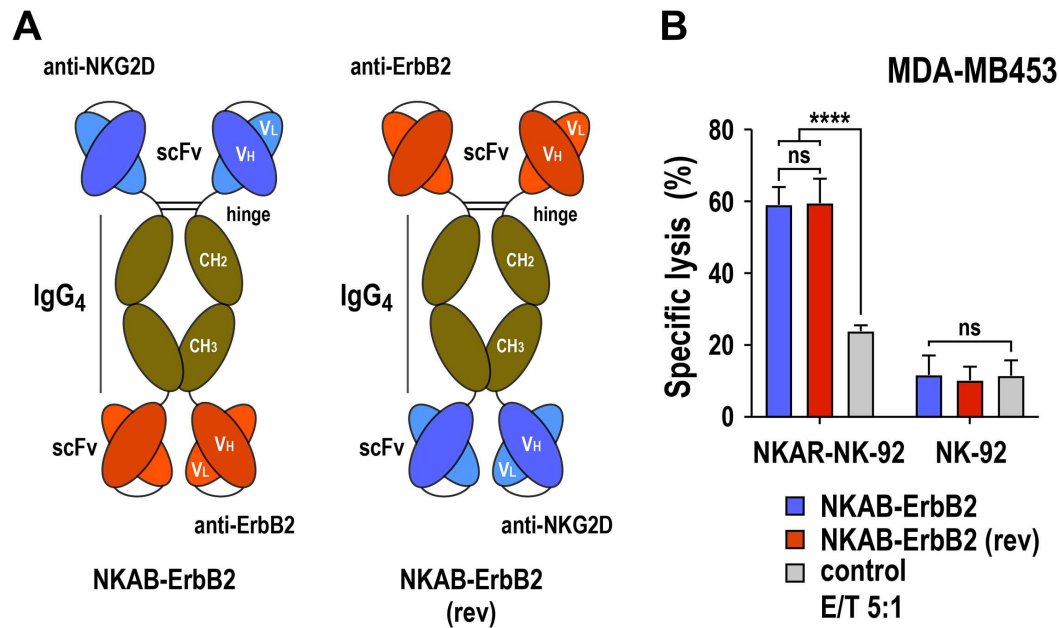

**Supplementary Figure S4** Comparative analysis of bispecific antibodies NKAB-ErbB2 and NKAB-ErbB2 (rev). (A) Schematic representation of NKAB-ErbB2 harboring an NKG2D-specific scFv fragment at the N-terminus, followed by hinge, CH<sub>2</sub> and CH<sub>3</sub> domains of human IgG<sub>4</sub>, a (G<sub>4</sub>S)<sub>2</sub> linker, and a C-terminal ErbB2-specific scFv fragment (left), and NKAB-ErbB2 (rev), in which the positions of NKG2D- and ErbB2-specific antibody domains are switched (right). (B) The effects of NKAB-ErbB2 (blue bars) and NKAB-ErbB2 (rev) (red bars) on specific cytotoxicity of NKAR-NK-92 (left) and parental NK-92 cells (right) against ErbB2-positive MDA-MB453 breast carcinoma cells was determined in FACS-based cytotoxicity assays after co-incubation at an effector to target ratio (E/T) of 5:1 for 3 hours in the absence (gray bars) or presence of 0.32 nM (50 ng/mL) of bispecific antibodies. Mean values ± SD are shown; n=4 technical replicates. Data were analyzed by two-tailed unpaired Student's *t*-test. \*\*\*\*, *p* < 0.0001; ns: not significant (*p* > 0.05).

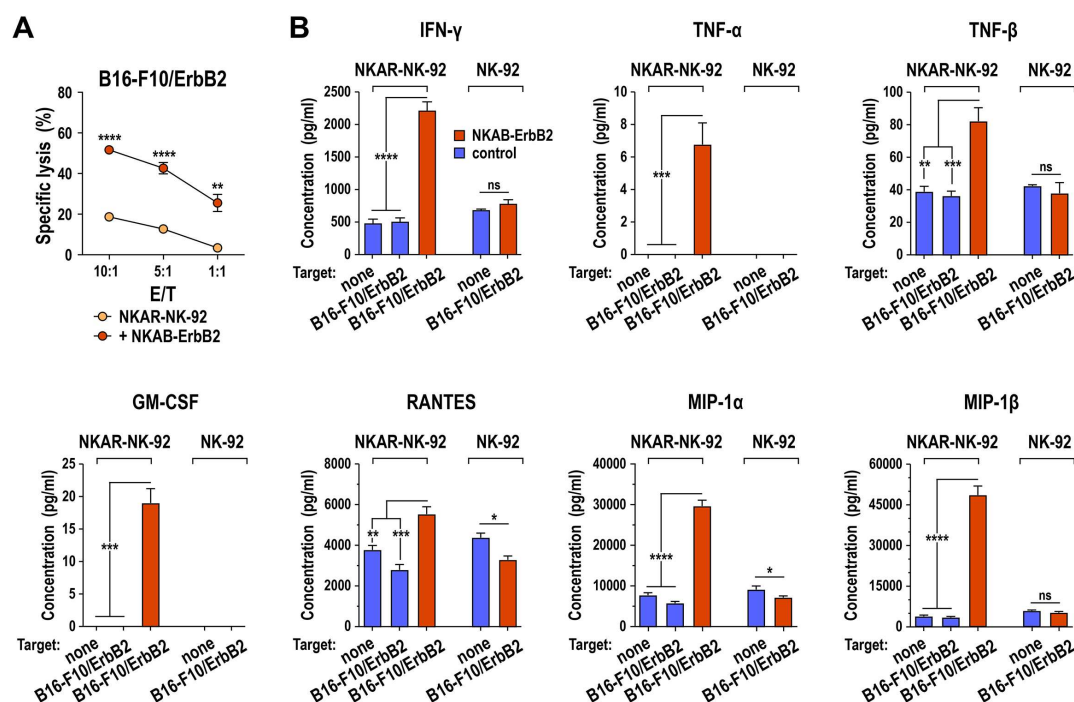

**Supplementary Figure S5** Activity of NKAB-ErbB2 and NKAR-NK-92 against ErbB2-expressing melanoma cells. (A) Cytotoxicity of NKAR-NK-92 in the absence (orange circles) or presence (red circles) of 0.16 nM (25 ng/mL) of NKAB-ErbB2 against murine B16-F10/ErbB2 melanoma cells expressing human ErbB2 was investigated in FACS-based cytotoxicity assays after co-incubation at different E/T ratios for 3 hours. Mean values  $\pm$  SD are shown;  $n=3$  technical replicates from a representative experiment. (B) NKAR-NK-92 or parental NK-92 cells at a density of  $5 \times 10^5$  cells/mL were incubated for 6 hours with B16-F10/ErbB2 cells at an E/T ratio of 1:1 in the absence (blue bars) or presence (red bars) of 0.16 nM (25 ng/mL) NKAB-ErbB2 as indicated. NK cells kept in the absence of tumor cells were included as controls. Supernatants were collected and the levels of IFN- $\gamma$ , TNF- $\alpha$ , TNF- $\beta$ , GM-CSF, RANTES (CCL5), MIP-1 $\alpha$  (CCL3) and MIP-1 $\beta$  (CCL4) were measured using a cytometric bead array. Mean values  $\pm$  SD are shown;  $n=3$  technical replicates. Data in (A) and (B) were analyzed by two-tailed unpaired Student's *t*-test. \*\*\*\*,  $p < 0.0001$ ; \*\*\*,  $p < 0.001$ ; \*\*,  $p < 0.01$ ; \*,  $p < 0.05$ ; ns: not significant ( $p > 0.05$ ).

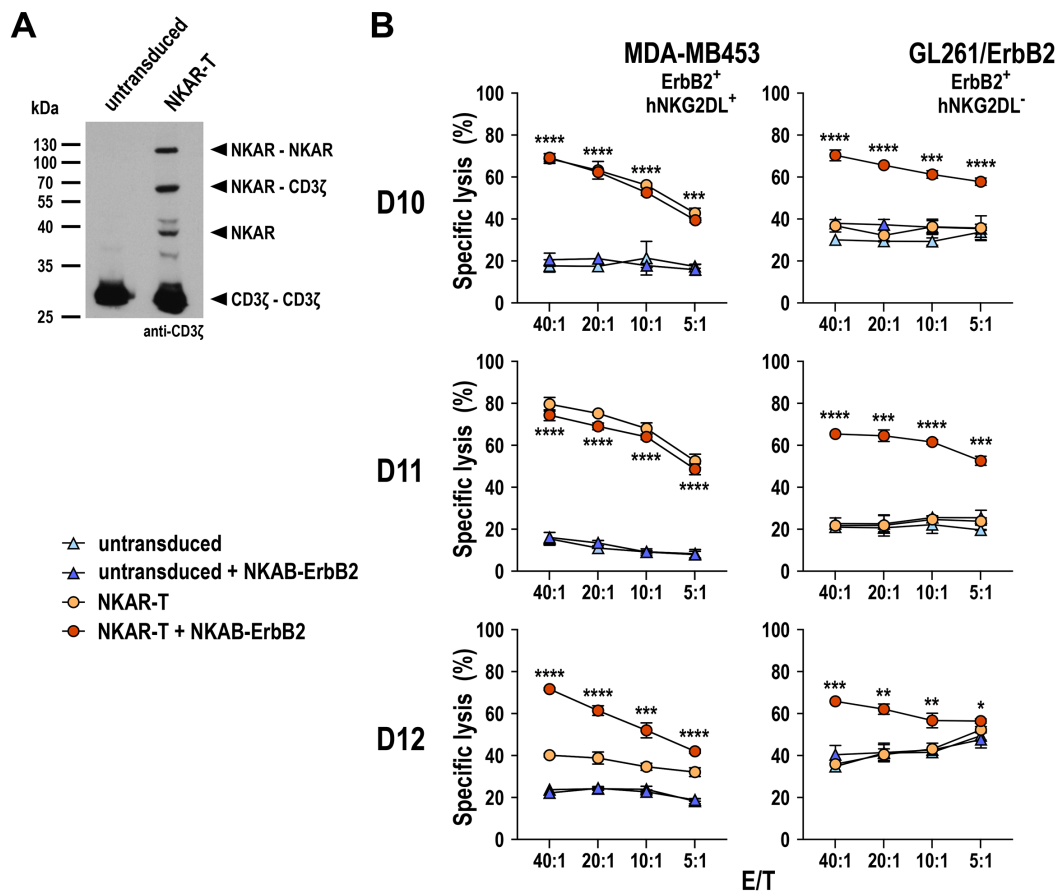

**Supplementary Figure S6** Generation and functional characterization of NKAR-T cells. Peripheral blood mononuclear cells (PBMC) from healthy donors were stimulated overnight with immobilized anti-CD3 and anti-CD28 antibodies. Activated PBMCs were then cultured for three days in medium containing IL-2, before transduction with VSV-G pseudotyped NKAR-encoding lentiviral particles. Five to six days later, successfully transduced cells were enriched by flow cytometric cell sorting according to their EGFP expression. (A) Expression of NKAR by transduced T cells was analyzed by SDS-PAGE of whole cell lysate under non-reducing conditions and immunoblotting with CD3 $\zeta$ -specific antibody, followed by HRP-conjugated secondary antibody and chemiluminescent detection. Lysate of untransduced T cells was included as control. The positions of NKAR homodimers and monomers, CD3 $\zeta$  homodimers, and NKAR-CD3 $\zeta$  heterodimers are indicated by arrowheads. Data from a representative donor are shown. (B) Cytotoxicity of NKAR-T (orange circles) and untransduced T cells (light blue triangles) in the absence, and NKAR-T (red circles) and untransduced T cells (dark blue triangles) in the presence of 0.64 nM (100 ng/mL) of bispecific NKAB-ErbB2 antibody against human MDA-MB453 breast carcinoma cells endogenously expressing ErbB2 and NKG2D ligands (left) and murine GL261/ErbB2 glioblastoma cells stably expressing human ErbB2 but no NKG2D ligands reactive with human NKG2D (right) was investigated in FACS-based cytotoxicity assays after co-cubation at different E/T ratios for 3 hours. Mean values  $\pm$  SD are shown; n=3 technical replicates for each donor. Data were analyzed by two-tailed unpaired Student's *t*-test (shown for NKAR-T cells + NKAB-ErbB2 versus untransduced T cells + NKAB-ErbB2). \*\*\*\*,  $p < 0.0001$ ; \*\*\*,  $p < 0.001$ ; \*\*,  $p < 0.01$ ; \*,  $p < 0.05$ .



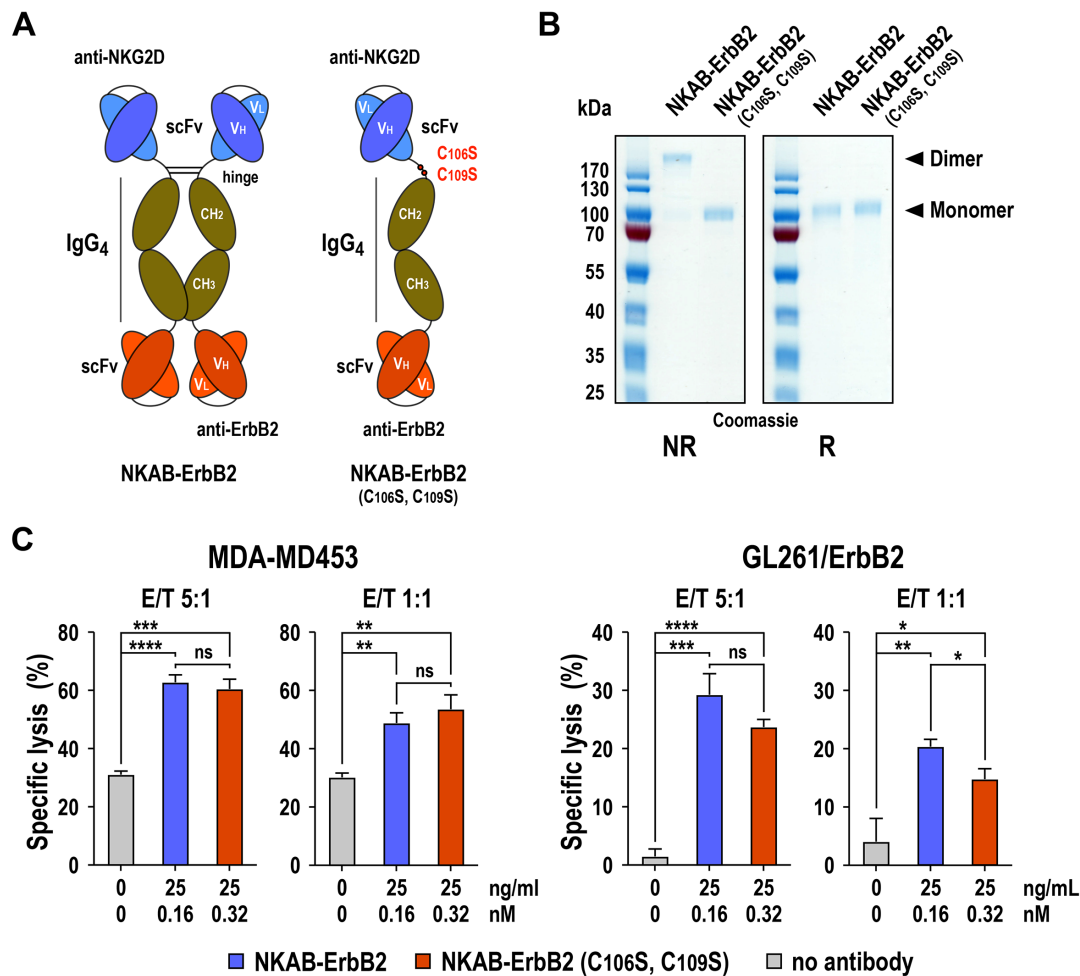

**Supplementary Figure S7** (A) Schematic representation of bispecific antibody NKAB-ErbB2 with intact intermolecular disulfide bridges within the IgG<sub>4</sub> hinge region (left) and mutated monomeric NKAB-ErbB2 (C<sub>106</sub>S, C<sub>109</sub>S) wherein the cysteine residues within the hinge region are replaced by serine residues. (B) Analysis of purified NKAB-ErbB2 and NKAB-ErbB2 (C<sub>106</sub>S, C<sub>109</sub>S) proteins by SDS-PAGE under non-reducing (NR) or reducing conditions (R) and Coomassie staining. The positions of NKAB-ErbB2 monomers and homodimers are indicated. NKAB-ErbB2 (C<sub>106</sub>S, C<sub>109</sub>S) protein was expressed in HEK 293T cells and purified as described in Materials & Methods for NKAB-ErbB2. (C) Specific cytotoxicity of NKAR-NK-92 cells against ErbB2-positive human MDA-MB453 breast carcinoma cells (left) or murine GL261/ErbB2 cells expressing human ErbB2 but no ligands cross-reactive with human NKG2D (right) in the absence of bispecific antibody (gray bars) or in the presence of dimeric NKAB-ErbB2 (blue bars) or monomeric NKAB-ErbB2 (C<sub>106</sub>S, C<sub>109</sub>S) (red bars) was determined in FACS-based cytotoxicity assays after co-incubation at an effector to target ratio (E/T) of 5:1 or 1:1 for 3 hours. To correct for the different number of binding sites in homodimers and monomers, equal ng/mL concentrations of the proteins were used. Mean values  $\pm$  SD are shown; n=3 technical replicates. Data were analyzed by two-tailed unpaired Student's *t*-test. \*\*\*\*,  $p < 0.0001$ ; \*\*\*,  $p < 0.001$ ; \*\*,  $p < 0.01$ ; \*,  $p < 0.05$ ; ns: not significant ( $p > 0.05$ ).



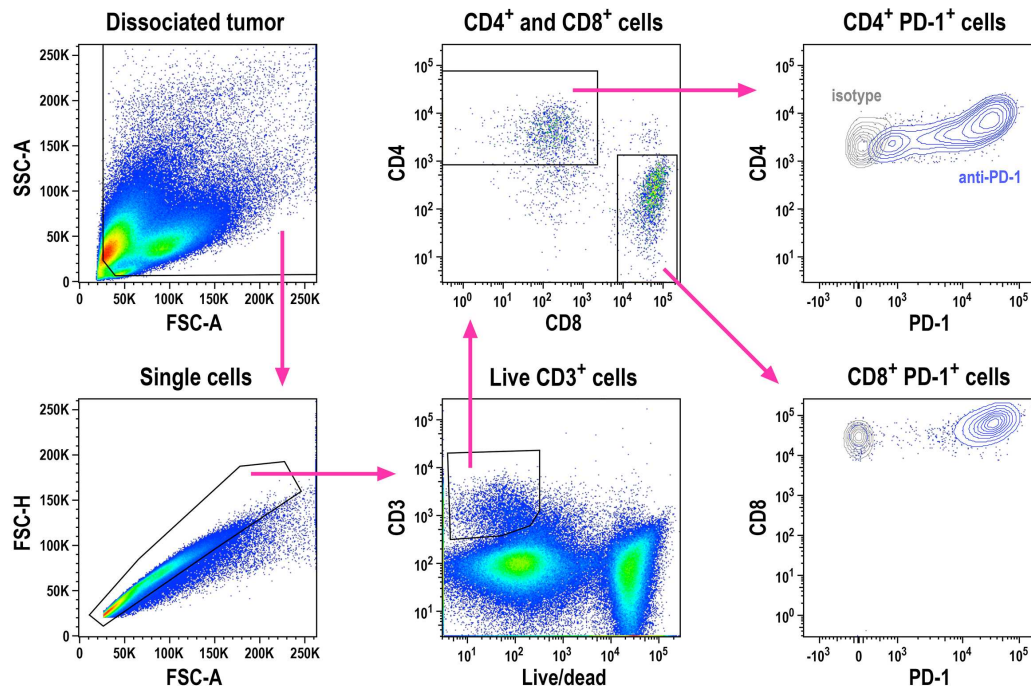

**Supplementary Figure S8** Gating strategy applied for the analysis of tumor-infiltrating lymphocytes. PD-1 expression by CD4<sup>+</sup> and CD8<sup>+</sup> T cells within the population of live CD3<sup>+</sup> cells of singularized cells from dissociated tumor tissues was assessed with a PD-1-specific antibody as indicated. An irrelevant antibody of the same isotype served as a control. Exemplary data from one of the animals shown in Figure 7E treated with the combination of NKAR-NK-92 cells and NKAB-ErbB2 are shown. PD-1 expression by CD4<sup>+</sup> and CD8<sup>+</sup> T cells from spleen and peripheral blood was determined in the same manner.
